# Supplementary material
Source: Research Square preprint supplement (doi:10.21203/rs.3.rs-9043759/v1)
Supplement: Supplementary file 1 [file f1b3dc12c1792c438c74700f.docx]

**TABLES**

**Table 1. PEN-3 Cultural Model constructs and corresponding themes related to CHN communication with resettled refugee communities during the COVID-19 pandemic.**

| **Constructs of the PEN-3 Cultural Model** | **Themes** |
| --- | --- |
| **Cultural Identity** beliefs, values, and practices that shape individuals' understanding of health and illness within their cultural context. | 2) Fostering trust via culturally sensitive health messaging and modalities.    3) Culturally Tailored Communication and Community Responses to COVID-19 |
| **Relationships and Expectations:** the importance of interpersonal connections and community expectations in CHW practice. | 1) Applying a cultural lens to health information  2) Fostering trust via culturally sensitive health messaging and modalities  3) Culturally Tailored Communication and Community Responses to COVID-19  4) CHNs as a health communication link to the health system |
| **Cultural empowerment** is fostered by Community Health Workers (CHWs), who enhance health literacy, advocate for prevention, and mobilize resources, enabling informed decision-making and fostering resilient community development. | 1) Applying a cultural lens to health information  3) Culturally Tailored Communication and Community Responses to COVID-19  4) CHNs as a health communication link to the health system |

**Table 2: of the PEN-3 Cultural Model domains and subcomponents as applied to CHNs engaging refugee communities during the COVID-19 pandemic.**

| **PEN-3 Domain** | **Subcomponent** | **Illustrative concept in our study** |
| --- | --- | --- |
| **Cultural Identity** | *Person* | CHNs as refugee insiders |
|  | *Extended Family* | Framing messages to protect elders and children |
| *Neighborhood* | Use of WhatsApp groups, community forums |
|  | | |
| **Relationships & Expectations** | *Perceptions* | Fear, denial, and fatalism about COVID-19 |
|  | *Enablers* | Multilingual flyers, CHN hospital integration |
| *Nurturers* | Faith leaders, community elders |
|  | | |
| **Cultural Empowerment** | *Positive* | Communal duty, respect for elders, trust in CHNs |
|  | *Existential* | Social rituals, herbal use, transnational info flow |
| *Negative* | Vaccine denial, prayer-only beliefs, misinformation via WhatsApp |
